# Supplementary material for: Copper-mediated synthesis of quinazolin-4(3H)-ones from N-(quinolin-8-yl)benzamide and amidine hydrochlorides
Source: Royal Society of Chemistry journal article supplement (doi:10.1039/c9nj02311a), 2019-01-01

## Copper-mediated synthesis of quinazolin-4(3*H*)-ones from *N*-(quinolin-8-yl)benzamide and amidine hydrochlorides

### 1. General information

<sup>1</sup>H NMR and <sup>13</sup>C NMR spectra were recorded on Bruker 300M and Mercury 400M in CD<sub>3</sub>SOCD<sub>3</sub>. All <sup>1</sup>H NMR and <sup>13</sup>C NMR chemical shifts were given as δ value (ppm) with reference to tetramethylsilane (TMS) as an internal standard. Copies of their <sup>1</sup>H NMR and <sup>13</sup>C NMR spectra were provided. Products were purified by flash chromatography on 200–300 mesh silica gels. All melting points were determined without correction. All reactions were carried out in oven-dried glassware, all reagents were obtained from commercial suppliers and used without further purification, unless otherwise noted.

### 2. Experimental procedures and characterizations of substrates

#### 2.1. General procedure for preparation of 1 (1a as an example)

**General procedure:** To a solution of 8-aminoquinoline (3.00 g, 21 mmol) and *N*-dimethyl-4-aminopyridine (80 mg, 0.65 mmol) in anhydrous CH<sub>2</sub>Cl<sub>2</sub> (30 mL) under nitrogen Et<sub>3</sub>N (3.3 mL, 24 mmol, 1.2 equiv) was added and resulting solution was cooled to 0 °C. Benzoyl chloride (2.3 mL, 20 mmol) was added dropwise and reaction mixture was stirred at room temperature overnight. The mixture was quenched with water (30 mL) and extracted with CH<sub>2</sub>Cl<sub>2</sub> (3 x 20 mL). Combined organic phase was dried over MgSO<sub>4</sub> and filtered. Concentration in vacuum followed by recrystallization from toluene afforded 4.6g (94%) of *N*-(quinolin-8-yl)benzamide as a white solid.

#### 2.2. General procedure for preparation of 3 (3a as an example)

**General procedure:** A sealed tube was charged with *N*-(quinolin-8-yl) benzamide **1a** (25mg, 0.1mmol), benzamidine hydrochloride **2a** (24mg, 0.15 mmol), Cu(OAc)<sub>2</sub> (4 mg, 20 mol %) and K<sub>2</sub>CO<sub>3</sub> (28 mg, 0.2 mmol) at room temperature, and then solvent DMSO (2mL) was added. The resulting mixture was stirred at 110° C under air. After disappearance of the reactant (monitored by TLC), added 20mL saturated NaCl(aq) solution to the mixture, extracted with EtOAc 3 times (3 × 20mL). The extract was dried over anhydrous Na<sub>2</sub>SO<sub>4</sub> and concentrated under reduced pressure. The residue was purified by column chromatography on silica gel (Petroleum ether / ethyl acetate =4:1) to yield the desired product **3a** as a white solid (91% yield).

### 3. Further optimization of the reaction conditions<sup>a</sup>

| Entry | Catalyst             | Base                           | Solvent | Yield(%) <sup>b</sup> |
|-------|----------------------|--------------------------------|---------|-----------------------|
| 1     | Cu(OAc) <sub>2</sub> | EtONa                          | DMSO    | 18                    |
| 2     | Cu(OAc) <sub>2</sub> | NaOAc                          | DMSO    | 27                    |
| 3     | Cu(OAc) <sub>2</sub> | NaHCO <sub>3</sub>             | DMSO    | 63                    |
| 4     | Cu(OAc) <sub>2</sub> | Et <sub>3</sub> N              | DMSO    | nr                    |
| 5     | Cu(OAc) <sub>2</sub> | K <sub>3</sub> PO <sub>4</sub> | DMSO    | 32                    |
| 6     | CuO                  | K <sub>2</sub> CO <sub>3</sub> | DMSO    | 50                    |
| 7     | CuBr                 | K <sub>2</sub> CO <sub>3</sub> | DMSO    | 45                    |

#### 4. Spectral data of compounds

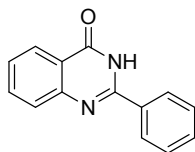

**2-phenylquinazolin-4(3H)-one (3a)** White solid; yield: 91% (20.0 mg), mp: 233–235 °C. <sup>1</sup>H NMR (300 MHz, DMSO-d<sub>6</sub>): δ 12.56 (s, 1H), 8.23 – 8.07 (m, 3H), 7.88 – 7.78 (m, 1H), 7.74 (d, *J* = 7.6 Hz, 1H), 7.61 – 7.48 (m, 4H). <sup>13</sup>C NMR (75 MHz, DMSO-d<sub>6</sub>) δ 162.03 (s), 152.06 (s), 148.51 (s), 134.32 (s), 132.48 (s), 131.13 (s), 128.34 (s), 127.53 (s), 127.27 (s), 126.31 (s), 125.62 (s), 120.75 (s). C<sub>14</sub>H<sub>10</sub>N<sub>2</sub>O HRMS [M+H]<sup>+</sup> calcd for 223.0866, found: 223.0871

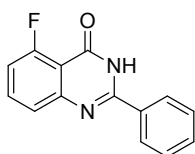

**5-fluoro-2-phenylquinazolin-4(3H)-one (3b)** White solid; yield: 52% (12.5 mg), mp: 308–310 °C; <sup>1</sup>H NMR (400 MHz, DMSO-d<sub>6</sub>) δ 12.55 (s, 1H), 8.22 – 8.11 (m, 2H), 7.82 – 7.73 (m, 1H), 7.59 – 7.50 (m, 4H), 7.24 (ddd, *J* = 10.9, 8.2, 0.8 Hz, 1H). <sup>13</sup>C NMR (100 MHz, DMSO-d<sub>6</sub>) δ 162.31 (s), 160.02 (s), 159.70 (s), 153.73–151.38 (d, *J*=235 Hz), 135.66–135.55 (d, *J*=10.0 Hz), 132.69 (s), 132.13 (s), 129.08 (s), 128.33 (s), 126.42 (s), 124.08 (s), 113.44–113.24 (d, *J*=20.0 Hz). C<sub>14</sub>H<sub>9</sub>FN<sub>2</sub>O HRMS [M+H]<sup>+</sup> calcd for 241.0772, found: 241.0776.

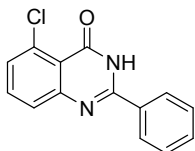

**5-chloro-2-phenylquinazolin-4(3H)-one (3c)** White solid; yield: 49% (12.6 mg), mp: 282–284 °C. <sup>1</sup>H NMR (300 MHz, DMSO-d<sub>6</sub>) δ 12.49 (s, 1H), 8.10 (td, *J* = 7.8, 1.3 Hz, 3H), 7.79 – 7.72 (m, 1H), 7.67 (d, *J* = 8.1 Hz, 1H), 7.56 – 7.37 (m, 3H). <sup>13</sup>C NMR (75 MHz, DMSO-d<sub>6</sub>) δ 162.99 (s), 153.03 (s), 149.34 (s), 135.26 (s), 133.40 (s), 132.06 (s), 129.27 (s), 128.44 (s), 128.10 (s), 127.24 (s), 126.53 (s), 121.64 (s). C<sub>14</sub>H<sub>9</sub>ClN<sub>2</sub>O HRMS [M+H]<sup>+</sup> calcd for 257.0476, found: 257.0476

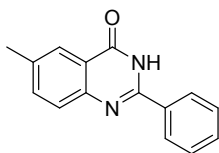

**6-methyl-2-phenylquinazolin-4(3H)-one (3e)** White solid; yield: 61% (14.5 mg); mp: 265–268 °C. <sup>1</sup>H NMR (300 MHz, DMSO-d<sub>6</sub>) δ 12.51 (s, 1H), 8.22 (dd, *J* = 7.8, 1.8 Hz, 2H), 8.00 (s, 1H), 7.69 (d, *J* = 1.2 Hz, 2H), 7.61 (dd, *J* = 7.5, 5.5 Hz, 3H), 2.50 (s, 3H). <sup>13</sup>C NMR (75 MHz, DMSO-d<sub>6</sub>) δ 161.79 (s), 146.38 (s), 136.80 (s), 135.92 (s), 135.49 (s), 132.42 (s), 130.85 (s), 128.22 (s), 127.27 (s), 124.88 (s), 120.37 (s), 20.50 (s). C<sub>15</sub>H<sub>12</sub>N<sub>2</sub>O HRMS [M+H]<sup>+</sup> calcd for 237.1023, found: 237.1022.

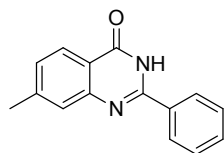

**7-methyl-2-phenylquinazolin-4(3H)-one (3g)** White solid; yield: 76% (18.1 mg); mp: 238-240 °C. <sup>1</sup>H NMR (400 MHz, DMSO-*d*<sub>6</sub>) δ 12.50 (s, 1H), 8.20 (dd, *J* = 8.1, 1.5 Hz, 2H), 8.06 (d, *J* = 8.1 Hz, 1H), 7.62 – 7.54 (m, 4H), 7.36 (dd, *J* = 8.1, 1.2 Hz, 1H), 2.49 (s, 3H). <sup>13</sup>C NMR (75 MHz, DMSO-*d*<sub>6</sub>) δHRMS (ESI): *m/z* calcd for C<sub>15</sub>H<sub>13</sub>N<sub>2</sub>O, 237.1028; found, 237.1019.162.78 (s), 152.97 (s), 149.51 (s), 145.72 (s), 133.43 (s), 132.00 (s), 129.26 (s), 128.68 (s), 128.36 (s), 127.81 (s), 126.37 (s), 119.24 (s), 22.04 (s). C<sub>15</sub>H<sub>12</sub>N<sub>2</sub>O HRMS [M+H]<sup>+</sup>calcd for237.1023, found: 237.1021.

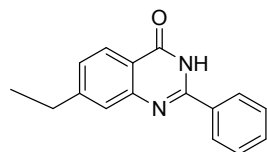

**7-ethyl-2-phenylquinazolin-4(3H)-one (3h)** White solid; yield: 81% (20.3 mg); mp: 250-252 °C <sup>1</sup>H NMR (400 MHz, DMSO-*d*<sub>6</sub>) δ 12.49 (s, 1H), 8.19 (dd, *J* = 8.1, 1.5 Hz, 2H), 8.07 (d, *J* = 8.1 Hz, 1H), 7.56 (dd, *J* = 7.2, 4.5 Hz, 4H), 7.37 (dd, *J* = 8.1, 1.5 Hz, 1H), 2.76 (d, *J* = 7.6 Hz, 2H), 1.25 (t, *J* = 7.6 Hz, 3H). <sup>13</sup>C NMR (75 MHz, DMSO-*d*<sub>6</sub>) δ 161.94 (s), 152.07 (s), 150.90 (s), 148.75 (s), 132.57 (s), 131.13 (s), 128.40 (s), 127.50 (s), 126.74 (s), 125.72 (s), 125.64 (s), 118.62 (s), 28.15 (s), 14.91 (s). C<sub>16</sub>H<sub>14</sub>N<sub>2</sub>O HRMS [M+H]<sup>+</sup> calcd for 251.1179, found: 251.1182.

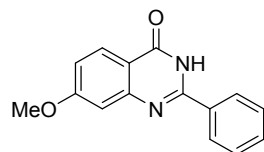

**7-methoxy-2-phenylquinazolin-4(3H)-one (3i)** White solid; yield: 68% (17.3 mg), mp: 235-236 °C. <sup>1</sup>H NMR (300 MHz, DMSO-*d*<sub>6</sub>) δ 12.45 (s, 1H), 8.21 (dt, *J* = 5.4, 1.4 Hz, 2H), 8.08 (dd, *J* = 8.8, 1.4 Hz, 1H), 7.65 – 7.52 (m, 3H), 7.21 (t, *J* = 1.9 Hz, 1H), 7.16 – 7.04 (m, 1H), 3.94 (d, *J* = 1.4 Hz, 3H). <sup>13</sup>C NMR (100 MHz, DMSO-*d*<sub>6</sub>) δ 164.63 (s), 162.23 (s), 153.32 (s), 151.44 (s), 133.17 (s), 131.85 (s), 129.04 (s), 128.20 (s), 127.89 (s), 116.65 (s), 114.86 (s), 108.96 (s), 56.16 (s). C<sub>15</sub>H<sub>12</sub>N<sub>2</sub>O<sub>2</sub> HRMS [M+H]<sup>+</sup>calcd for 253.0972, found: 253.0977.

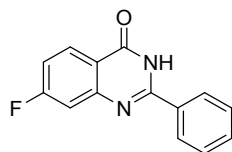

**7-fluoro-2-phenylquinazolin-4(3H)-one (3j)** White solid; yield: 82% (19.7 mg), mp >300 °C. <sup>1</sup>H NMR (400 MHz, DMSO-*d*<sub>6</sub>) δ 12.64 (s, 1H), 8.25 – 8.10 (m, 3H), 7.64 – 7.44 (m, 4H), 7.36 (td, *J* = 8.7, 2.5 Hz, 1H). <sup>13</sup>C NMR (100 MHz, DMSO-*d*<sub>6</sub>) δ 167.55 (s), 165.06 (s), 162.02 (s), 154.19 (s), 151.31 (s), 132.84 (s), 132.15 (s), 129.49-129.38 (d, *J*=11.0 Hz), 129.10-128.36 (d, *J*=74.0 Hz), 118.45 (s), 115.69-115.46 (d, *J*=23.0 Hz), 113.04-112.83 (d, *J*=21.0 Hz). C<sub>14</sub>H<sub>9</sub>FN<sub>2</sub>O HRMS [M+H]<sup>+</sup> calcd for241.0772, found: 241.0775.

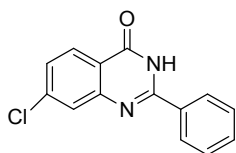

**7-chloro-2-phenylquinazolin-4(3H)-one (3k)** White solid; yield: 92% (23.6 mg) mp: 286–288 °C. <sup>1</sup>H NMR (400 MHz, DMSO-*d*<sub>6</sub>) δ 12.67 (s, 1H), 8.19 – 8.08 (m, 3H), 7.76 (d, *J* = 2.0 Hz, 1H), 7.61 – 7.49 (m, 4H). <sup>13</sup>C NMR (100 MHz, DMSO-*d*<sub>6</sub>) δ 162.14 (s), 154.24 (s), 150.32 (s), 139.63 (s), 132.82 (s), 132.18 (s), 129.10 (s), 128.37 (s), 127.25 (s), 127.02 (s), 120.25 (s). C<sub>14</sub>H<sub>9</sub>ClN<sub>2</sub>O HRMS [M+H]<sup>+</sup> calcd for 257.0476, found: 254.0478.

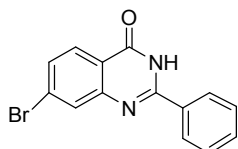

**7-bromo-2-phenylquinazolin-4(3H)-one (3l)** White solid; yield: 84% (25.3 mg); mp: 269–271 °C. <sup>1</sup>H NMR (300 MHz, DMSO-*d*<sub>6</sub>) δ 12.64 (s, 1H), 8.19 – 8.09 (m, 2H), 8.03 (d, *J* = 8.5 Hz, 1H), 7.90 (d, *J* = 1.8 Hz, 1H), 7.64 (dd, *J* = 8.5, 1.9 Hz, 1H), 7.59 – 7.50 (m, 3H). <sup>13</sup>C NMR (100 MHz, DMSO-*d*<sub>6</sub>) δ 162.26 (s), 154.15 (s), 150.39 (s), 132.83 (s), 132.17 (s), 130.13 (s), 129.99 (s), 129.09 (s), 128.61 (s), 128.38 (s), 120.56 (s). C<sub>14</sub>H<sub>9</sub>BrN<sub>2</sub>O HRMS [M+H]<sup>+</sup> calcd for 300.9971, found: 300.9976.

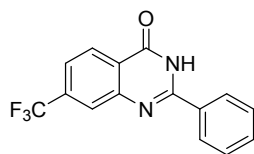

**2-phenyl-7-(trifluoromethyl)quinazolin-4(3H)-one (3m)** White solid, yield: 67% (19.5 mg), m.p. > 300 °C; <sup>1</sup>H NMR (300 MHz, DMSO-*d*<sub>6</sub>) δ 12.78 (s, 1H), 8.29 (d, *J* = 8.2 Hz, 1H), 8.21 – 8.12 (m, 2H), 7.99 (s, 1H), 7.75 (d, *J* = 8.3 Hz, 1H), 7.60 – 7.49 (m, 3H). <sup>13</sup>C NMR (75 MHz, DMSO-*d*<sub>6</sub>) δ 162.28 (s), 154.62 (s), 149.41 (s), 134.66 (s), 132.94 (s), 132.46 (s), 129.30–128.53 (d, *J* = 57.8 Hz), 128.33 (s), 125.15–124.44 (d, *J* = 53.3 Hz), 122.81 (s). C<sub>15</sub>H<sub>9</sub>F<sub>3</sub>N<sub>2</sub>O HRMS [M+H]<sup>+</sup> calcd for 291.0740, found: 291.0745

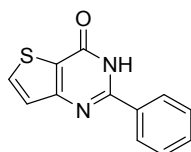

**2-phenylthieno[3,2-d]pyrimidin-4(3H)-one (3n)** Yellow solid, yield: 78% (17.8 mg). mp: 226 – 227 °C. <sup>1</sup>H NMR (300 MHz, DMSO-*d*<sub>6</sub>) δ 12.68 (s, 1H), 8.20 (d, *J* = 5.2 Hz, 1H), 8.15 – 8.08 (m, 2H), 7.59 – 7.49 (m, 3H), 7.46 (d, *J* = 5.2 Hz, 1H). <sup>13</sup>C NMR (75 MHz, DMSO-*d*<sub>6</sub>) δ 159.22 (s), 158.62 (s), 154.98 (s), 136.06 (s), 133.20 (s), 131.99 (s), 129.30 (s), 128.51 (s), 126.12 (s), 121.92 (s). C<sub>12</sub>H<sub>8</sub>N<sub>2</sub>OS HRMS [M+H]<sup>+</sup> calcd for 229.0430, found: 229.0428.

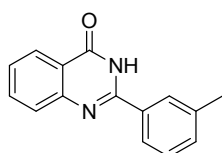

**2-(m-tolyl)quinazolin-4(3H)-one (3q)** White solid, yield: 45% (10.8 mg). mp: 210–212 °C. <sup>1</sup>H NMR

(400 MHz, DMSO- $d_6$ )  $\delta$  12.60 (s, 1H), 8.26 – 8.22 (m, 1H), 8.11 (s, 1H), 8.06 (d,  $J$  = 7.3 Hz, 1H), 7.94 – 7.88 (m, 1H), 7.83 (d,  $J$  = 7.8 Hz, 1H), 7.63 – 7.56 (m, 1H), 7.54 – 7.46 (m, 2H), 2.49 (s, 3H).  $^{13}\text{C}$  NMR (100 MHz, DMSO- $d_6$ )  $\delta$  162.67 (s), 152.83 (s), 149.24 (s), 138.37 (s), 135.04 (s), 133.10 (s), 132.46 (s), 128.96 (s), 128.75 (s), 127.95 (s), 126.98 (s), 126.31 (s), 125.35 (s), 121.45 (s), 21.43 (s).  $\text{C}_{15}\text{H}_{12}\text{N}_2\text{O}$  HRMS  $[\text{M}+\text{H}]^+$  calcd for 237.1023, found: 237.1028.

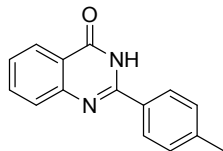

**2-(*p*-tolyl)quinazolin-4(3H)-one (3r)** White solid; yield: 61% (14.5 mg); mp: 261–263 °C.  $^1\text{H}$  NMR (300 MHz, DMSO- $d_6$ )  $\delta$  12.45 (s, 1H), 8.21 – 8.01 (m, 2H), 7.83 – 7.76 (m, 1H), 7.72 – 7.66 (m, 1H), 7.49 (ddd,  $J$  = 8.1, 7.1, 1.2 Hz, 1H), 7.34 (d,  $J$  = 8.0 Hz, 2H), 2.38 (s, 3H).  $^{13}\text{C}$  NMR (100 MHz, DMSO- $d_6$ )  $\delta$  162.71 (s), 152.71 (s), 149.29 (s), 141.93 (s), 135.04 (s), 130.37 (s), 129.67 (s), 128.15 (s), 127.88 (s), 126.86 (s), 126.31 (s), 121.36 (s), 21.46 (s).  $\text{C}_{15}\text{H}_{12}\text{N}_2\text{O}$  HRMS  $[\text{M}+\text{H}]^+$  calcd for 237.1023, found: 237.1025.

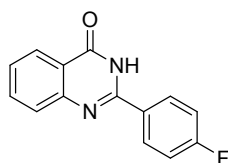

**2-(4-fluorophenyl)quinazolin-4(3H)-one (3s)** White solid; yield: 86% (20.7 mg); mp: 240–242 °C;  $^1\text{H}$  NMR (400 MHz, DMSO- $d_6$ )  $\delta$  12.55 (s, 1H), 8.26 – 8.21 (m, 2H), 8.14 (dd,  $J$  = 7.9, 1.1 Hz, 1H), 7.84 – 7.79 (m, 1H), 7.72 (d,  $J$  = 8.0 Hz, 1H), 7.50 (dd,  $J$  = 13.3, 6.2 Hz, 1H), 7.37 (t,  $J$  = 8.8 Hz, 2H).  $^{13}\text{C}$  NMR (100 MHz, DMSO- $d_6$ )  $\delta$  165.75 (s), 163.27 (s), 162.70 (s), 151.84 (s), 135.07 (s), 130.87–130.78 (d,  $J$  = 9.0 Hz), 129.70–128.87 (d,  $J$  = 83.0 Hz), 127.91 (s), 127.05 (s), 126.31 (s), 121.34 (s), 116.19–115.97 (d,  $J$  = 22.0 Hz). HRMS (ESI): calcd. for  $\text{C}_{14}\text{H}_9\text{N}_2\text{OF}$ .  $[\text{M}+\text{H}]^+$  241.0772, found: 241.0773.

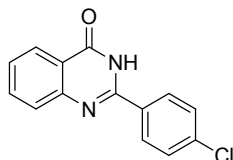

**2-(4-chlorophenyl)quinazolin-4(3H)-one (3t)** White solid; yield: 93% (23.9 mg); mp: 298–300 °C;  $^1\text{H}$  NMR (300 MHz, DMSO- $d_6$ )  $\delta$  12.62 (s, 1H), 8.16 (dd,  $J$  = 13.4, 8.5 Hz, 2H), 8.06 (d,  $J$  = 8.4 Hz, 2H), 7.57 (dd,  $J$  = 23.7, 8.1 Hz, 4H).  $^{13}\text{C}$  NMR (100 MHz, DMSO- $d_6$ )  $\delta$  162.69 (s), 151.85 (s), 148.99 (s), 136.76 (s), 135.11 (s), 132.04 (s), 130.08 (s), 129.52 (s), 129.14 (s), 128.23 (s), 127.22 (s), 126.34 (s), 121.46 (s).  $\text{C}_{14}\text{H}_9\text{ClN}_2\text{O}$  HRMS  $[\text{M}+\text{H}]^+$  calcd for 257.0476, found: 254.0479.

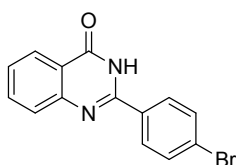

**2-(4-bromophenyl)quinazolin-4(3H)-one (3u)** White solid; yield: 89% (26.8 mg); mp: 292–295 °C;  $^1\text{H}$  NMR (300 MHz, DMSO- $d_6$ )  $\delta$  12.61 (s, 1H), 8.16 – 8.07 (m, 3H), 7.86 – 7.79 (m, 1H), 7.78 – 7.69 (m, 3H), 7.55 – 7.47 (m, 1H).  $^{13}\text{C}$  NMR (100 MHz, DMSO- $d_6$ )  $\delta$  162.62 (s), 151.93 (s), 149.04 (s), 135.15 (s), 132.38 (s), 132.09 (s), 130.28 (s), 128.00 (s), 127.27 (s), 126.35 (s), 125.71 (s), 121.48 (s).  $\text{C}_{14}\text{H}_9\text{BrN}_2\text{O}$  HRMS  $[\text{M}+\text{H}]^+$  calcd for 300.9971, found: 300.9976.

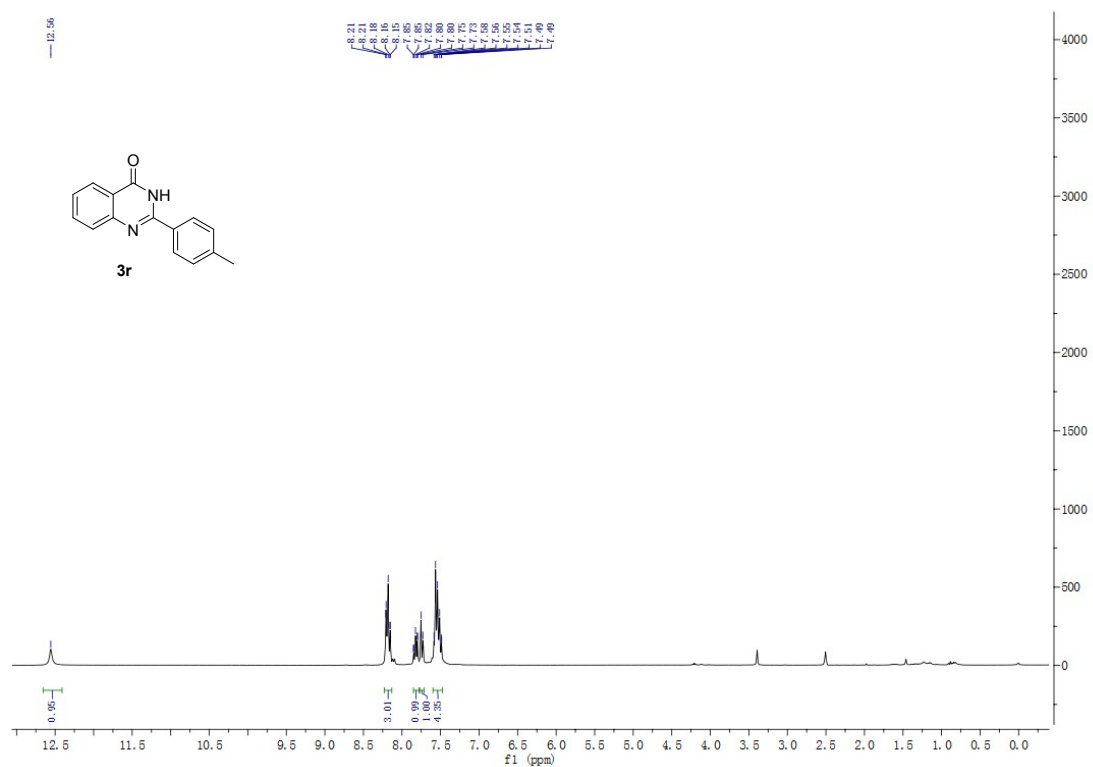



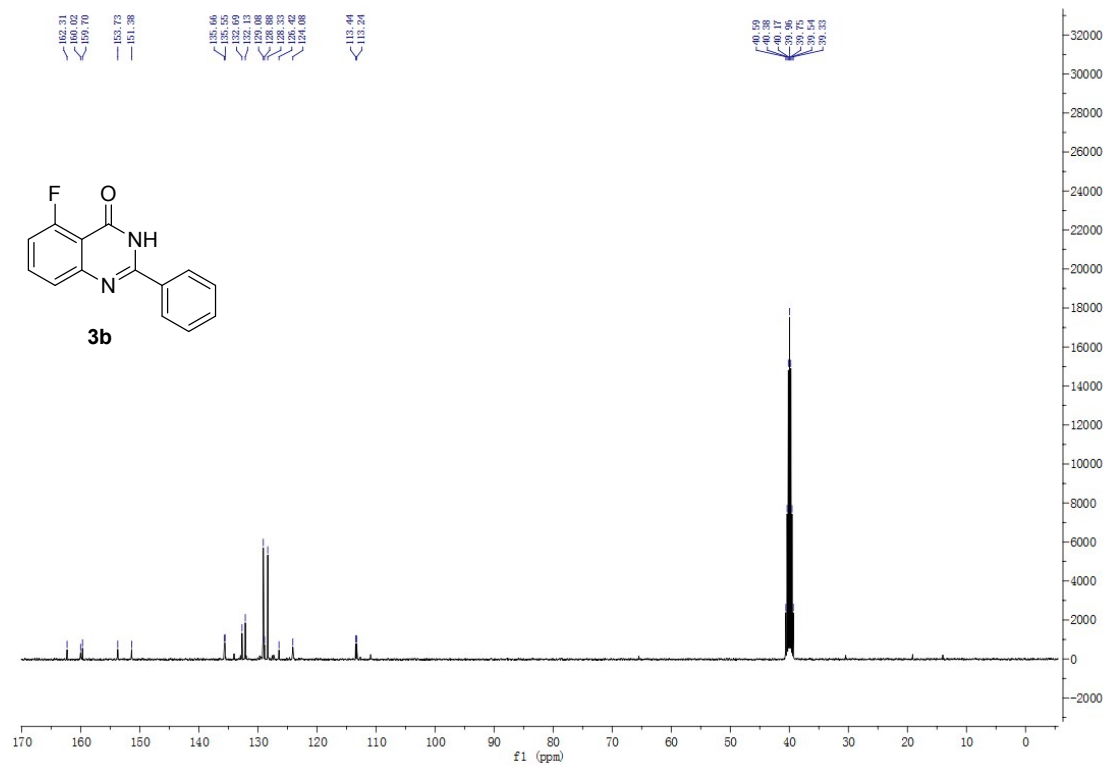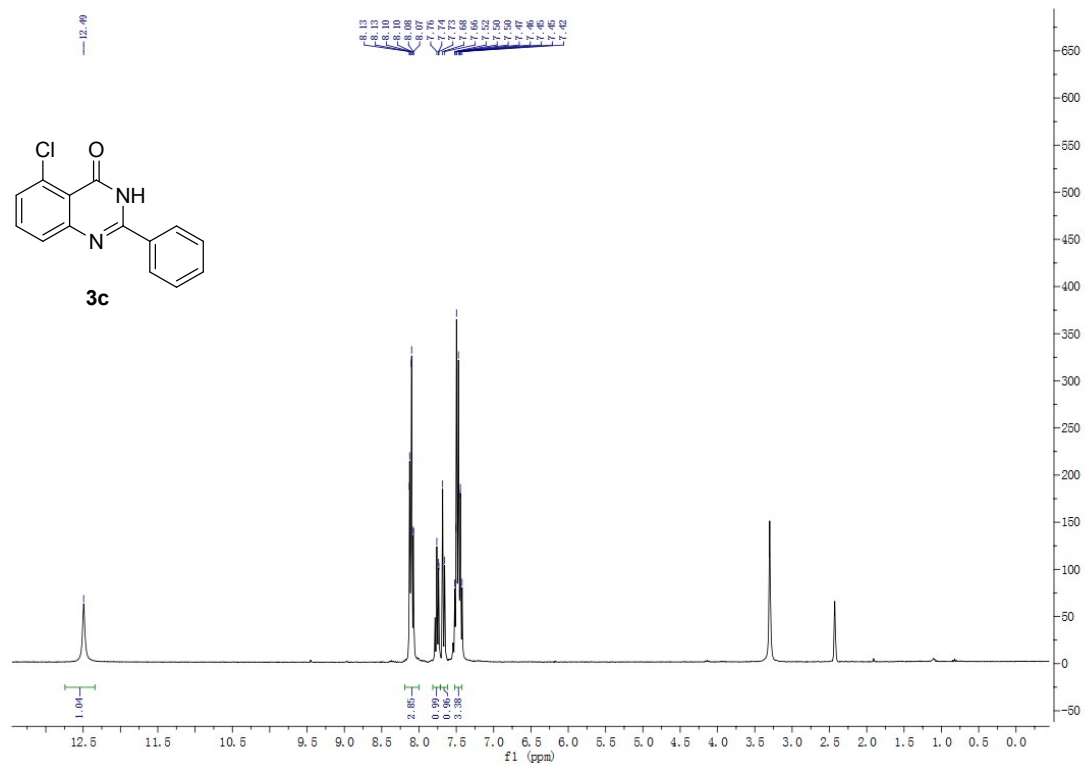



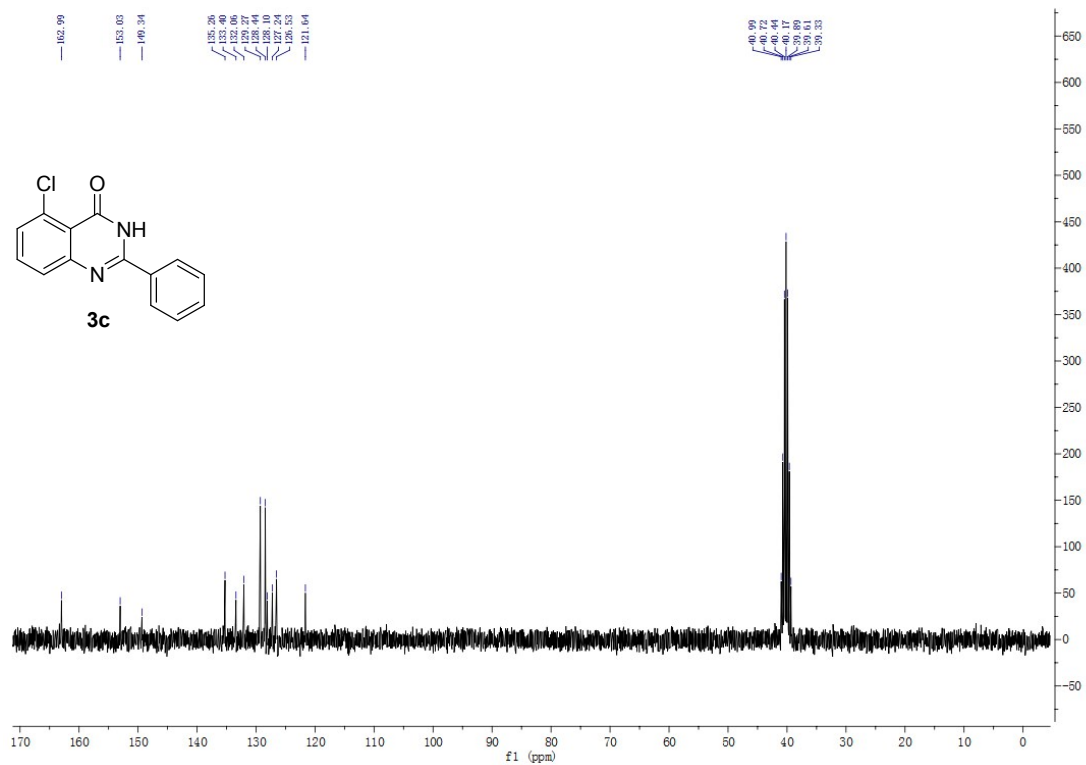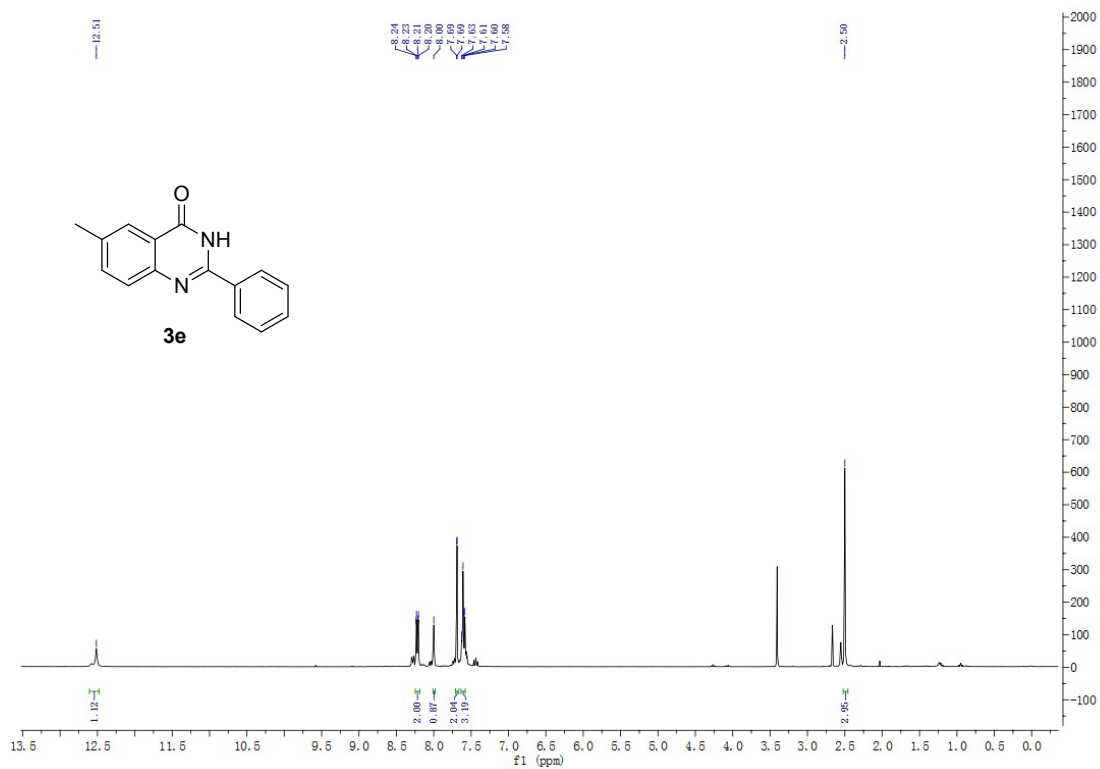

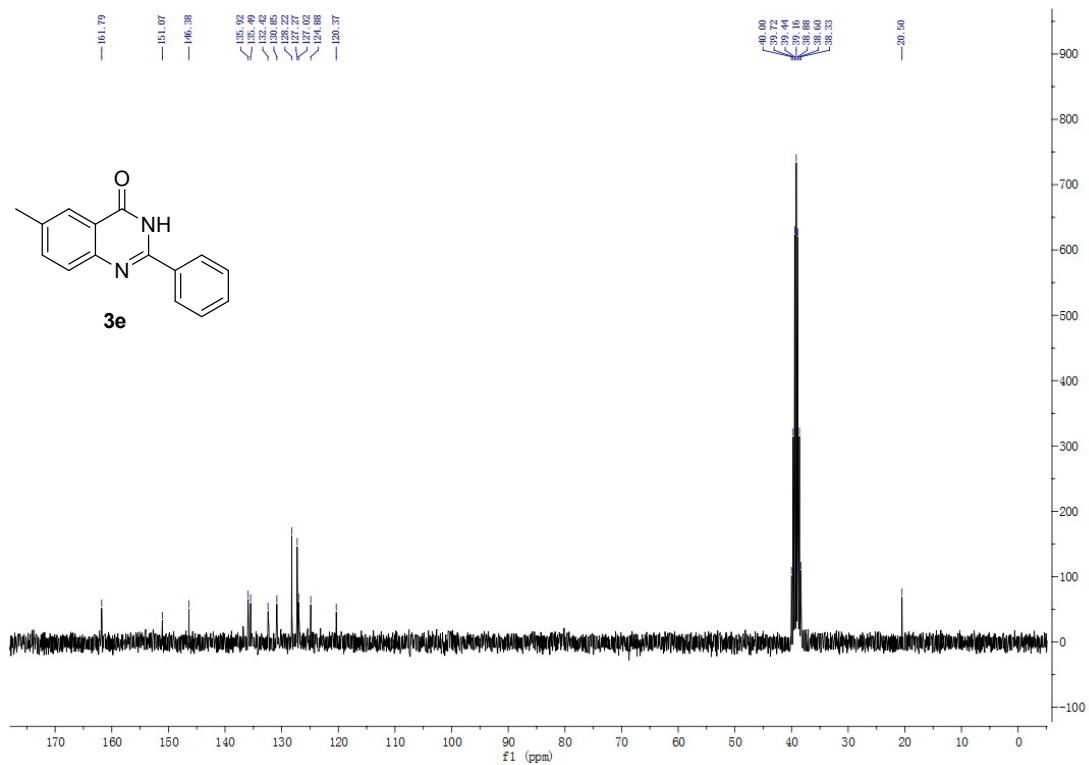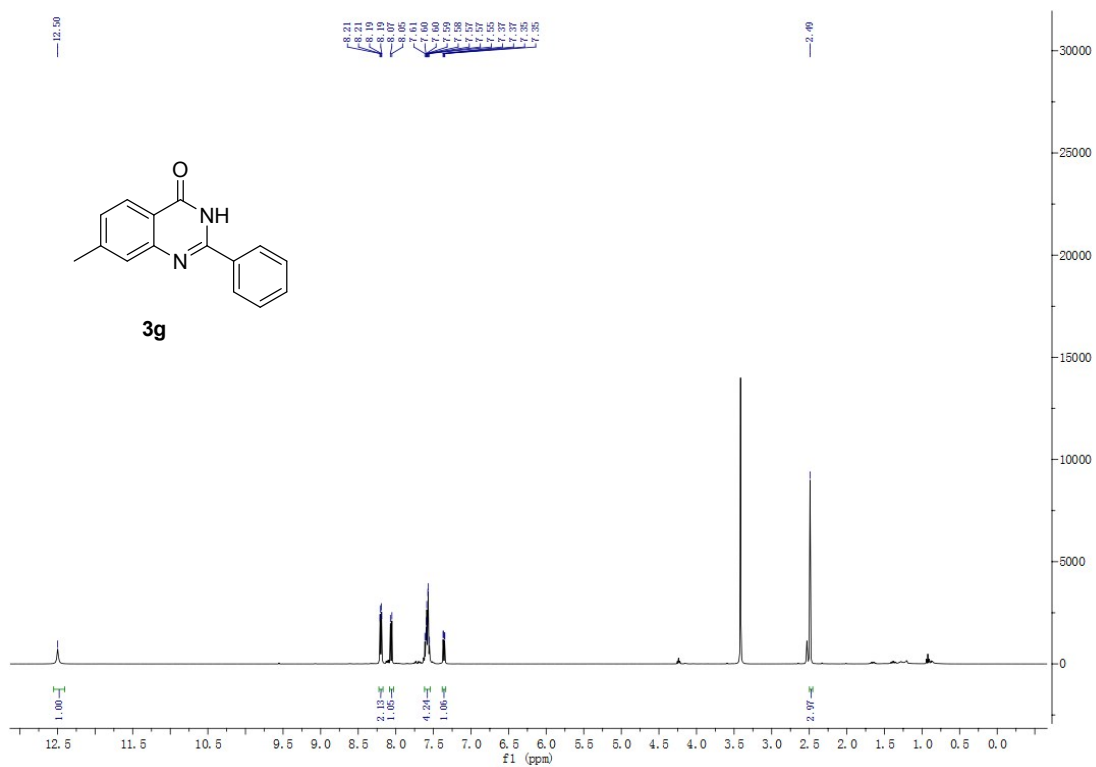

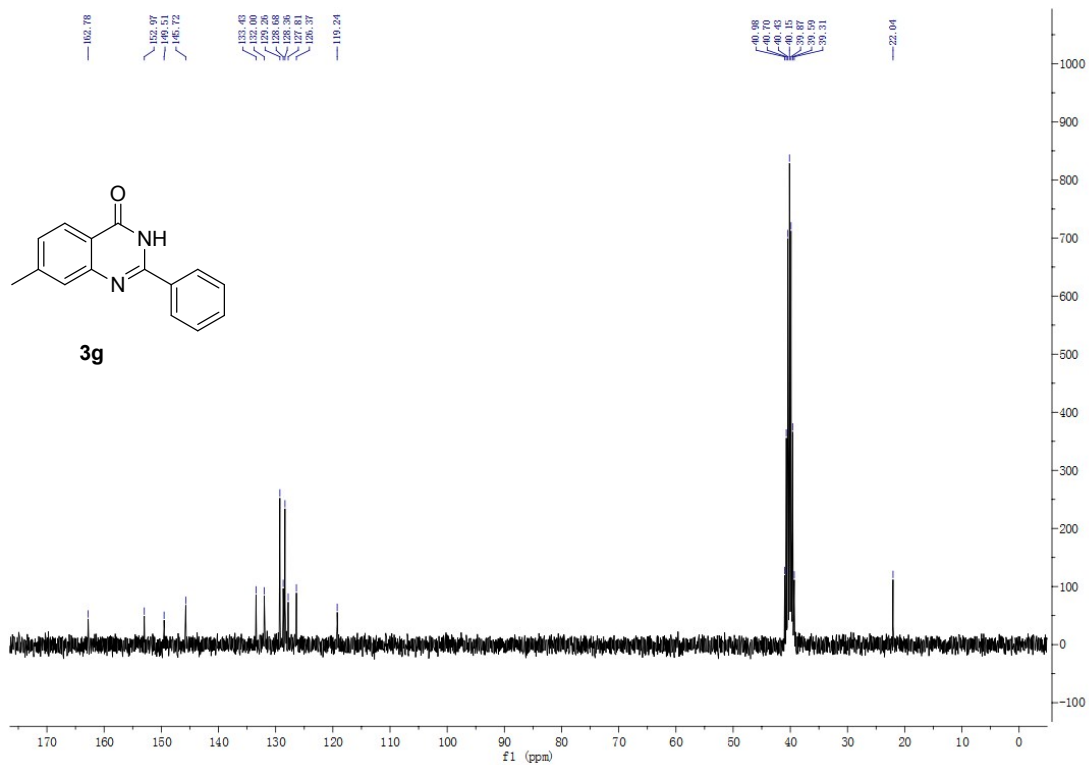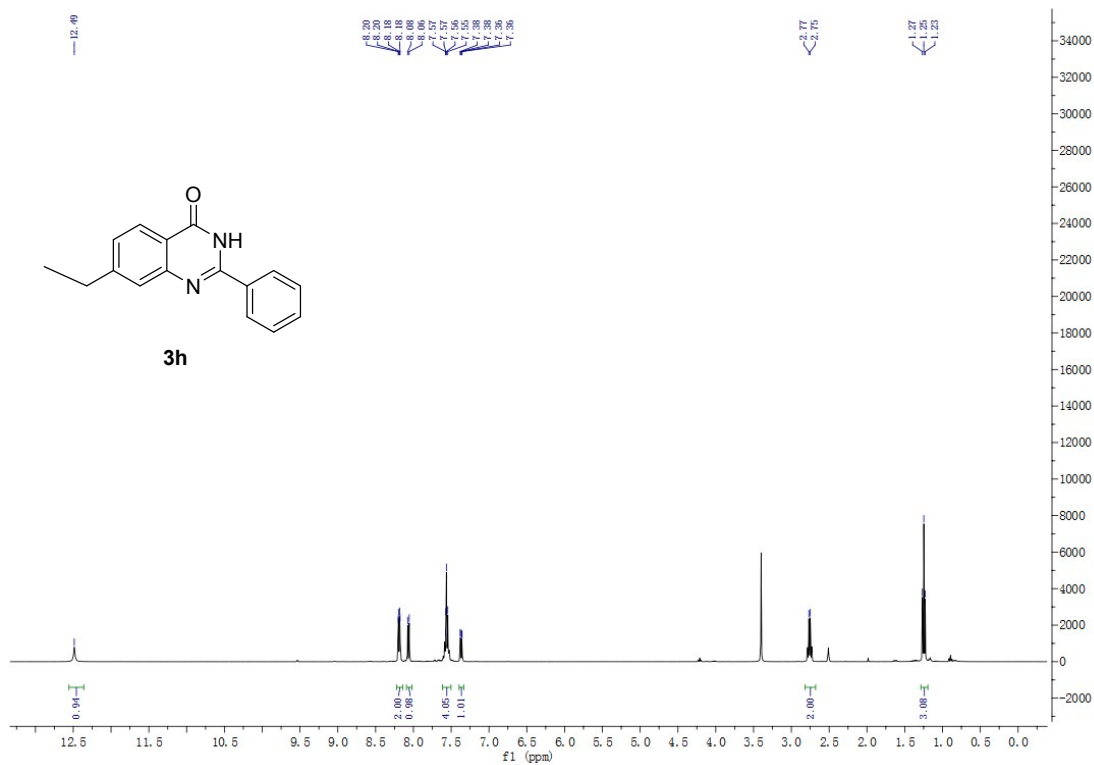

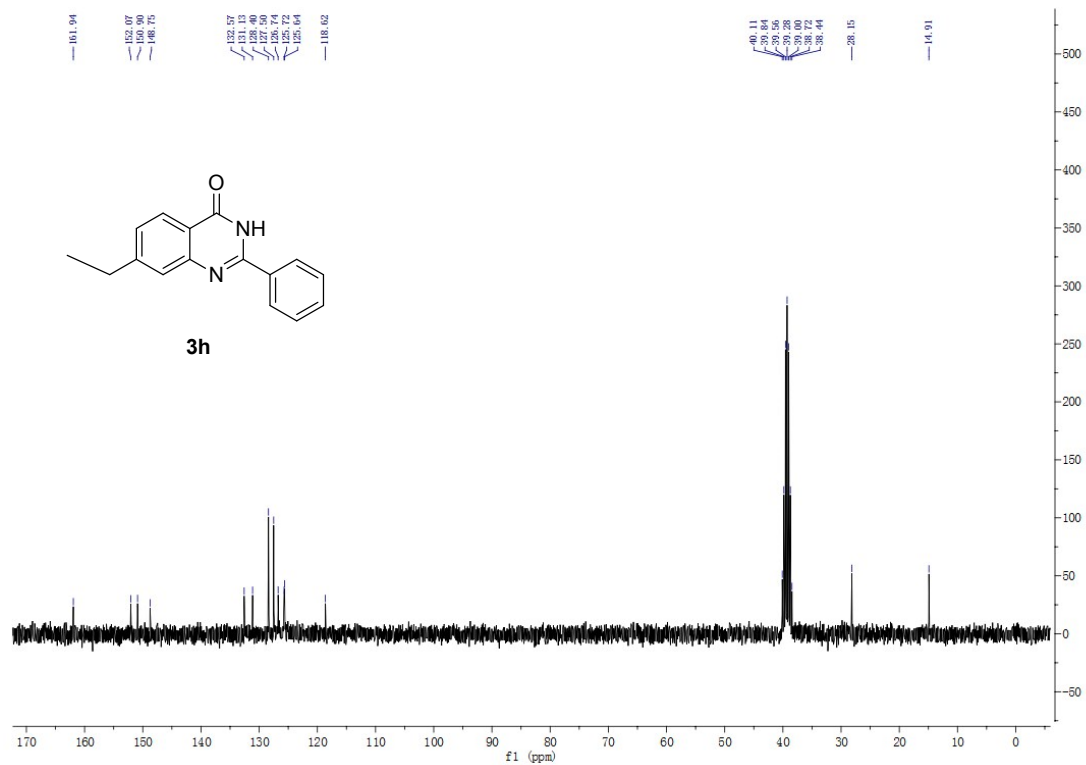

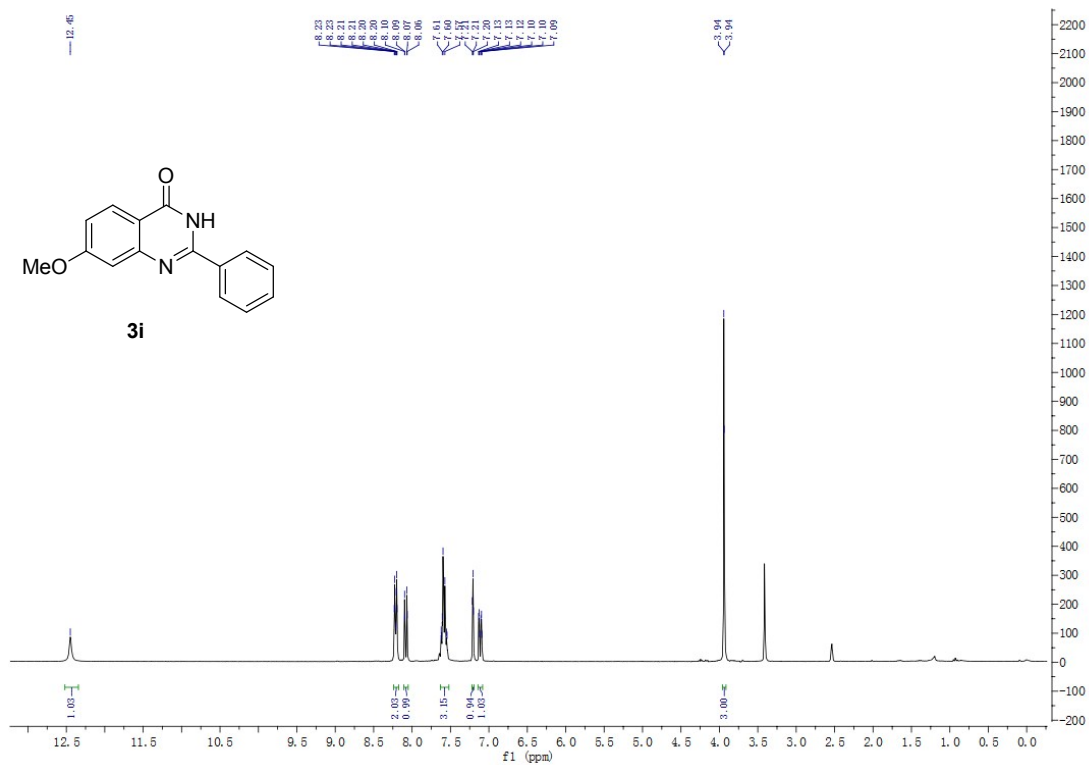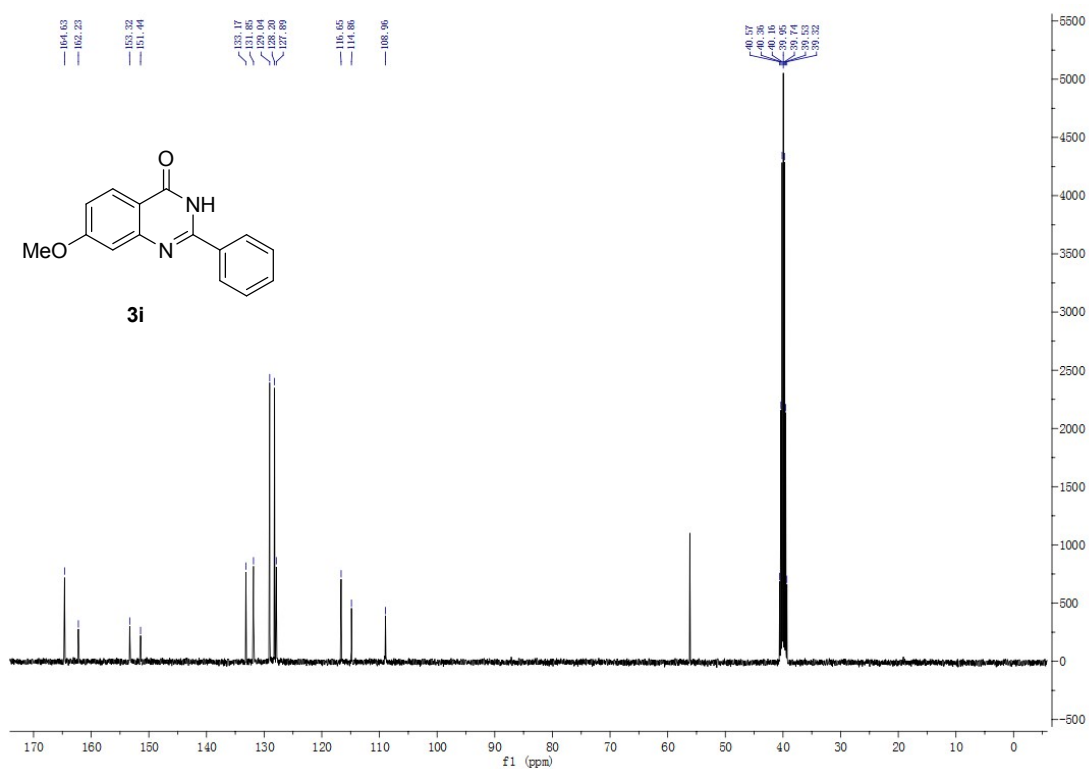

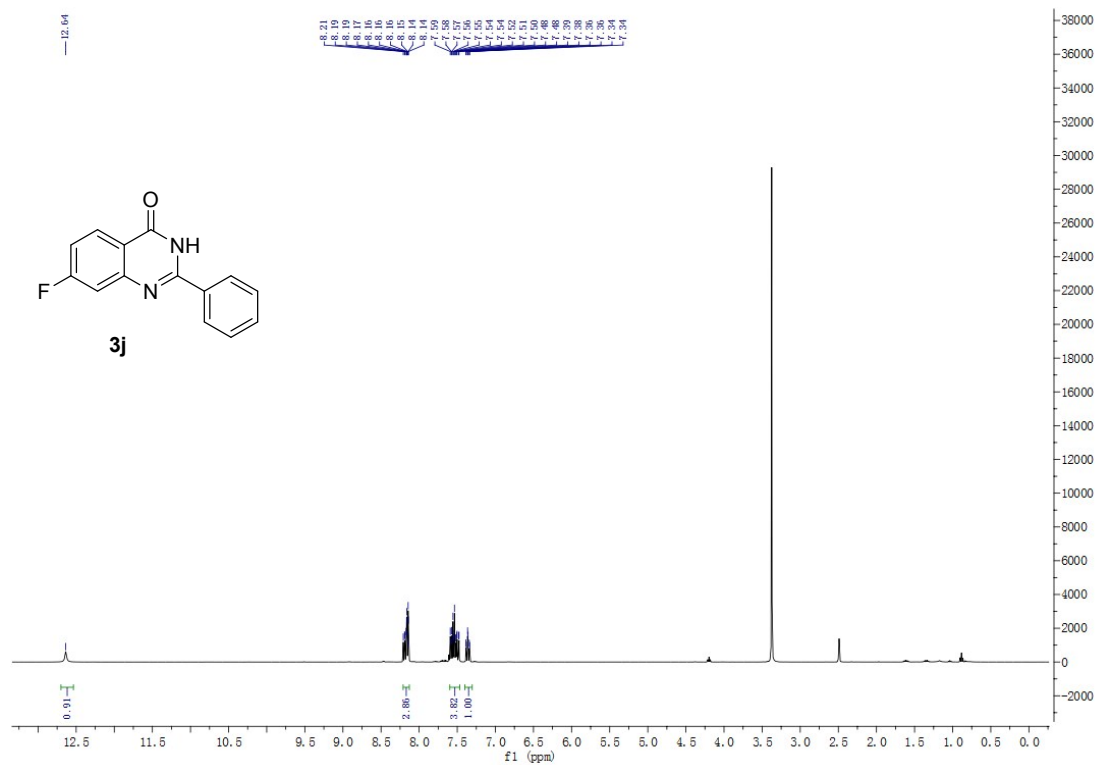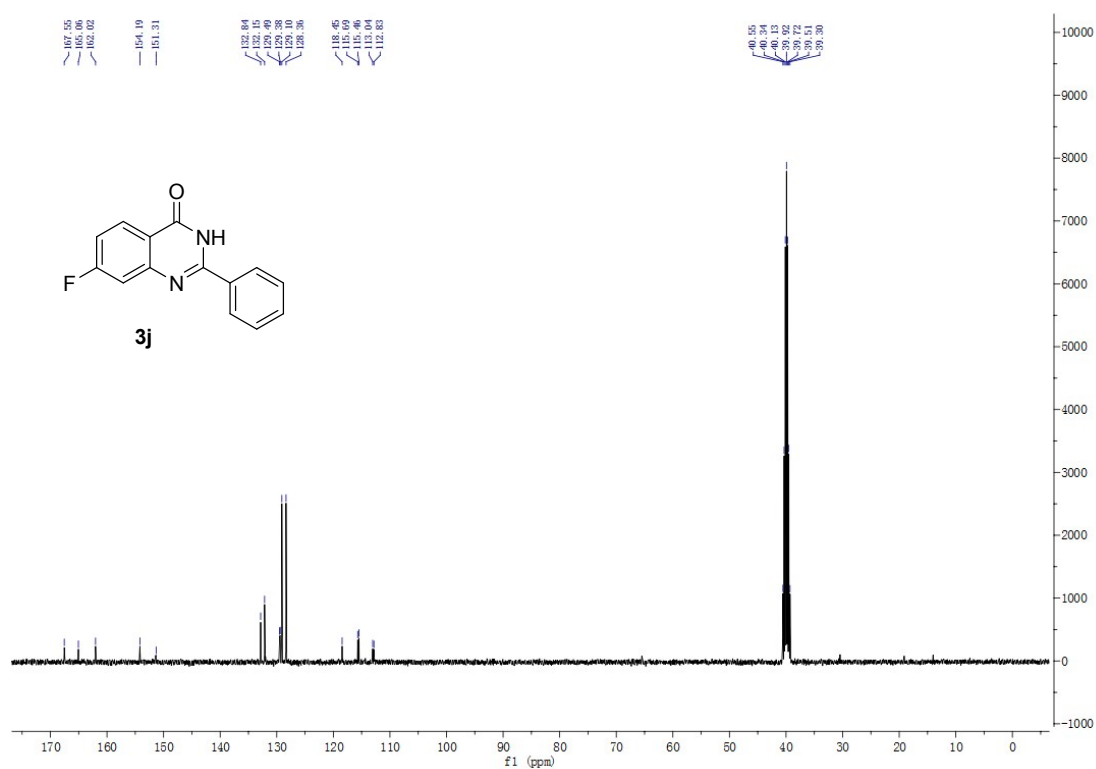

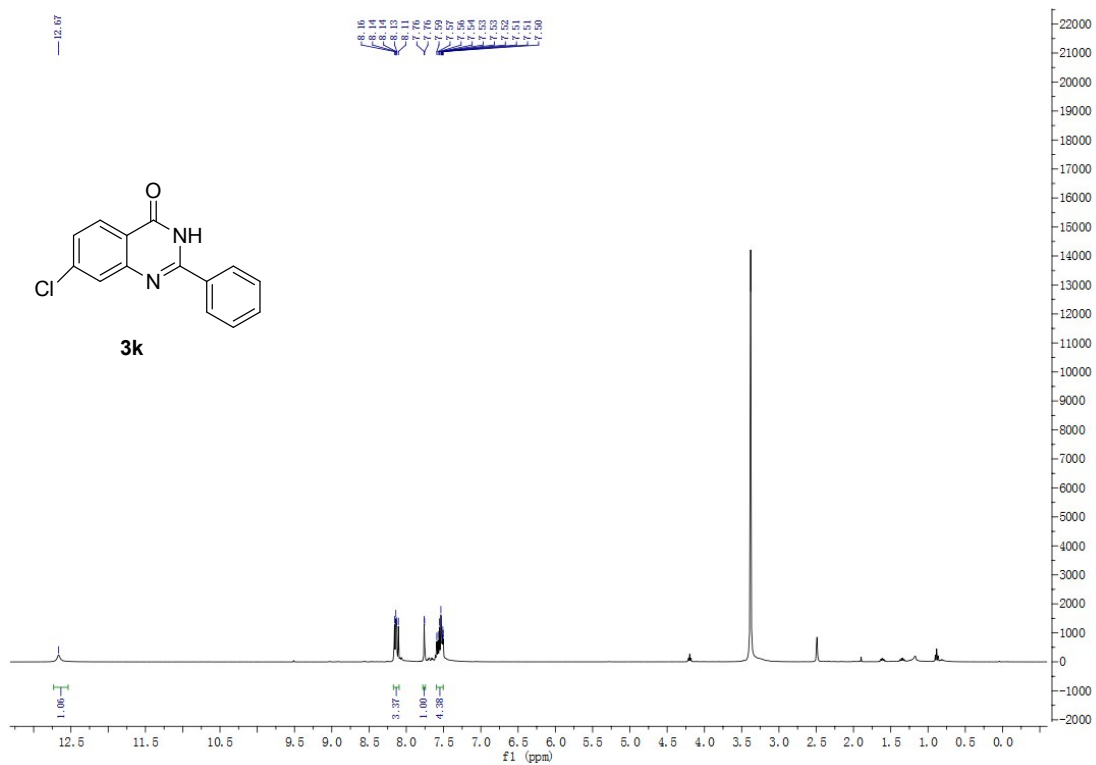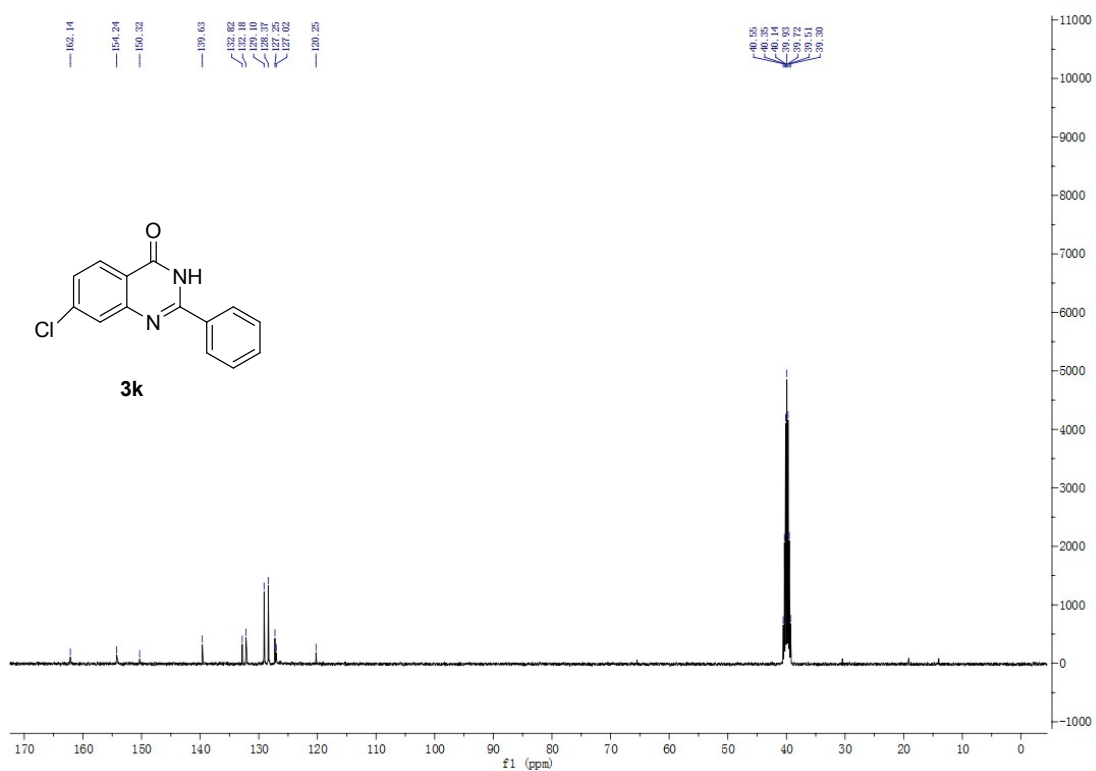

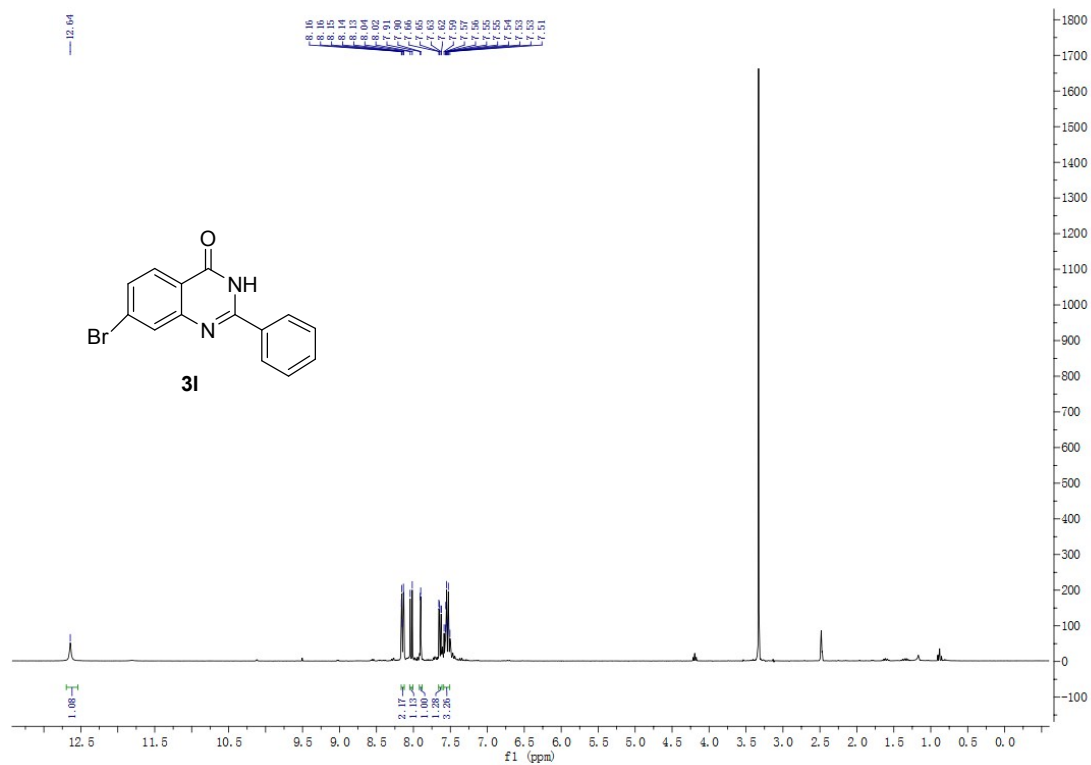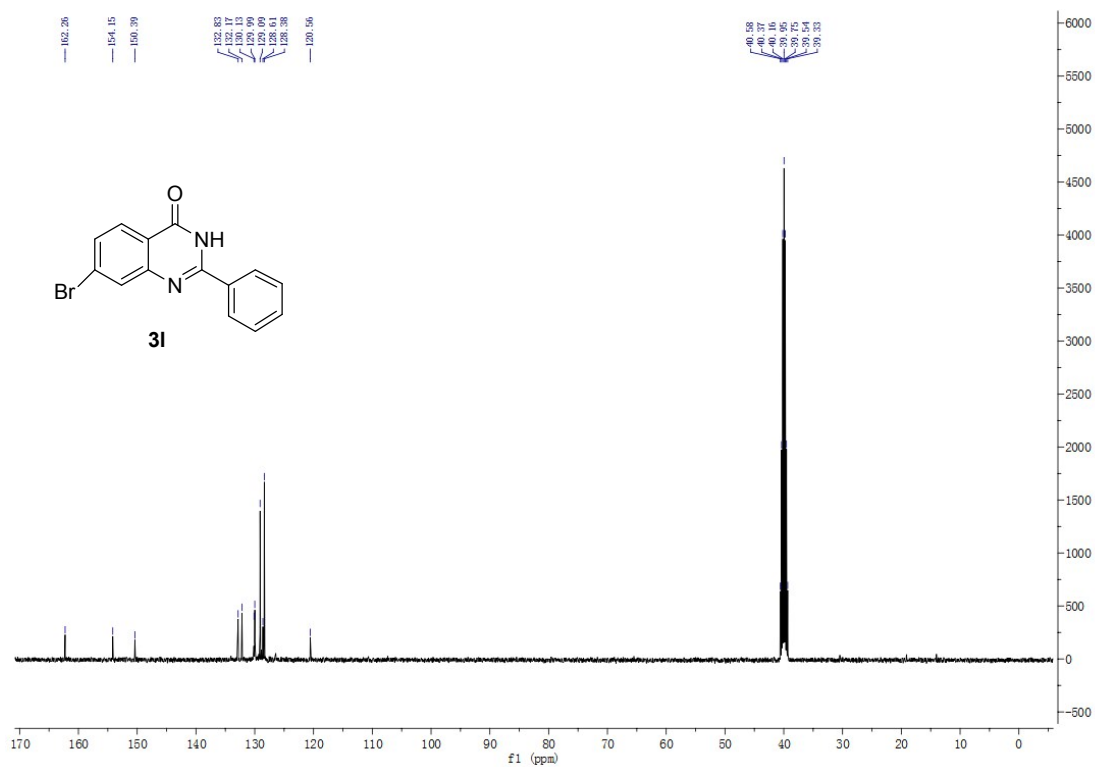



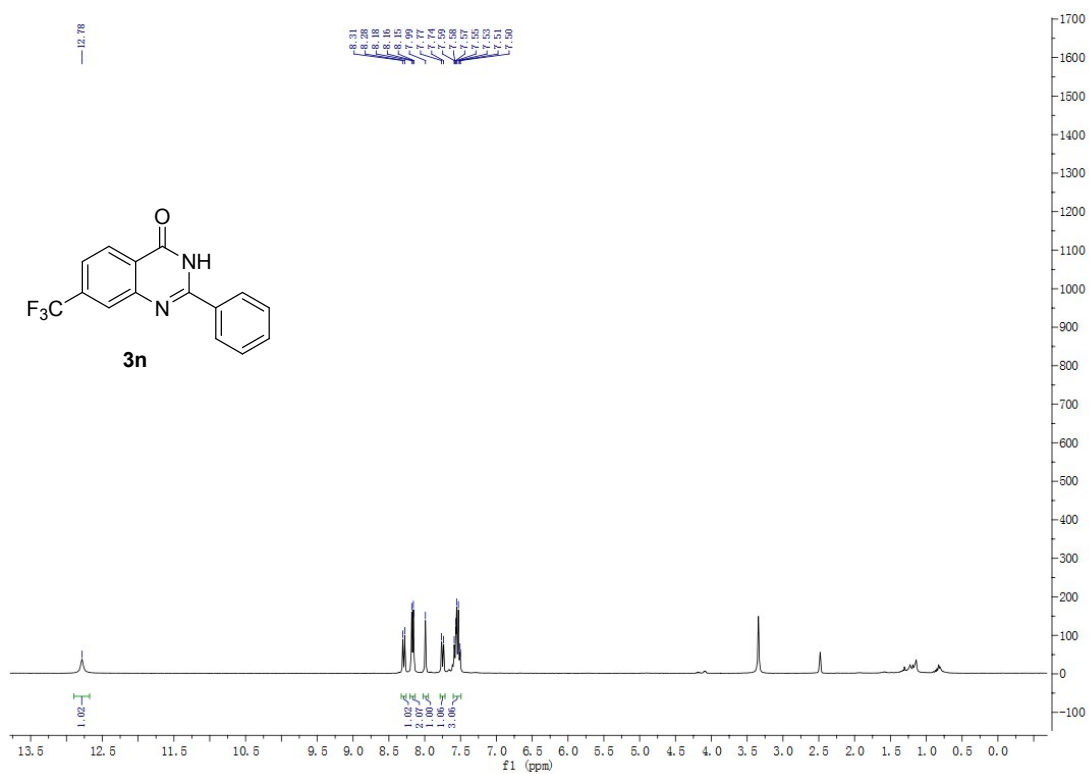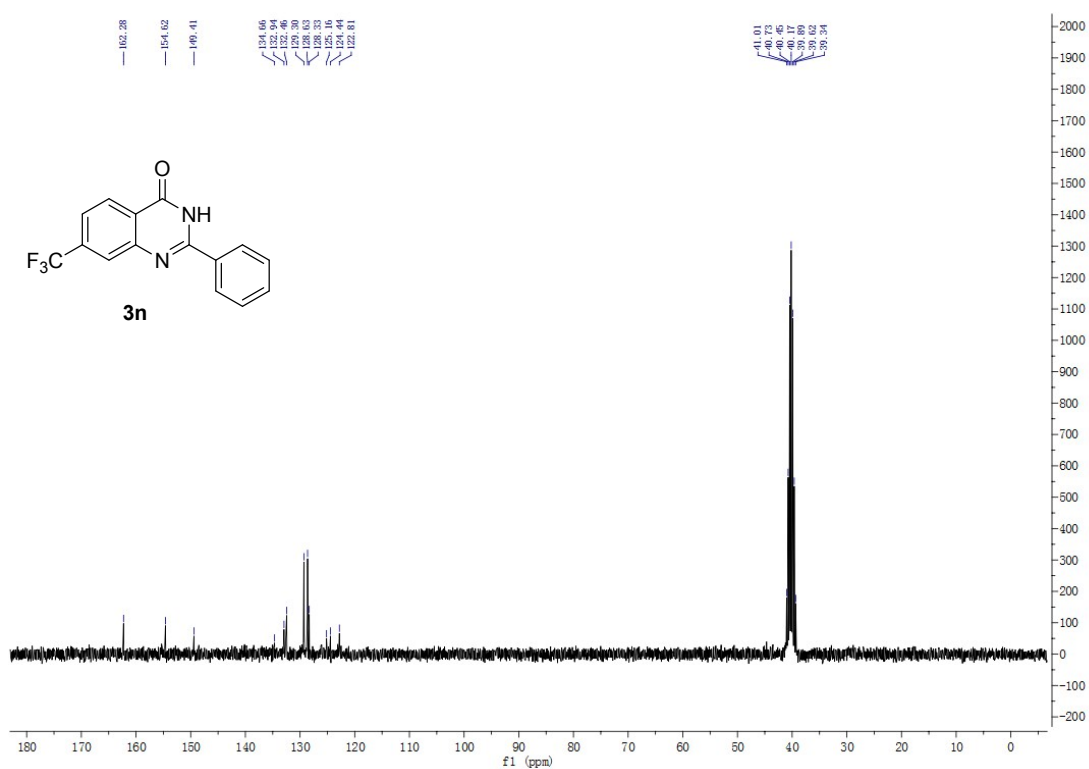

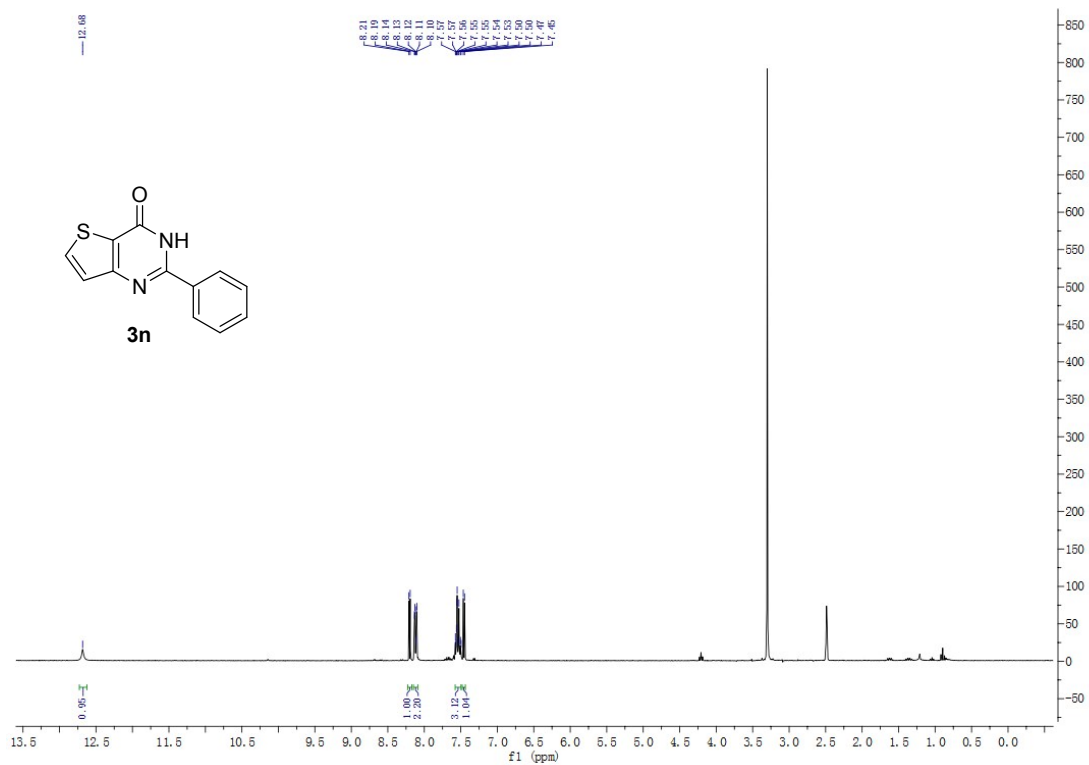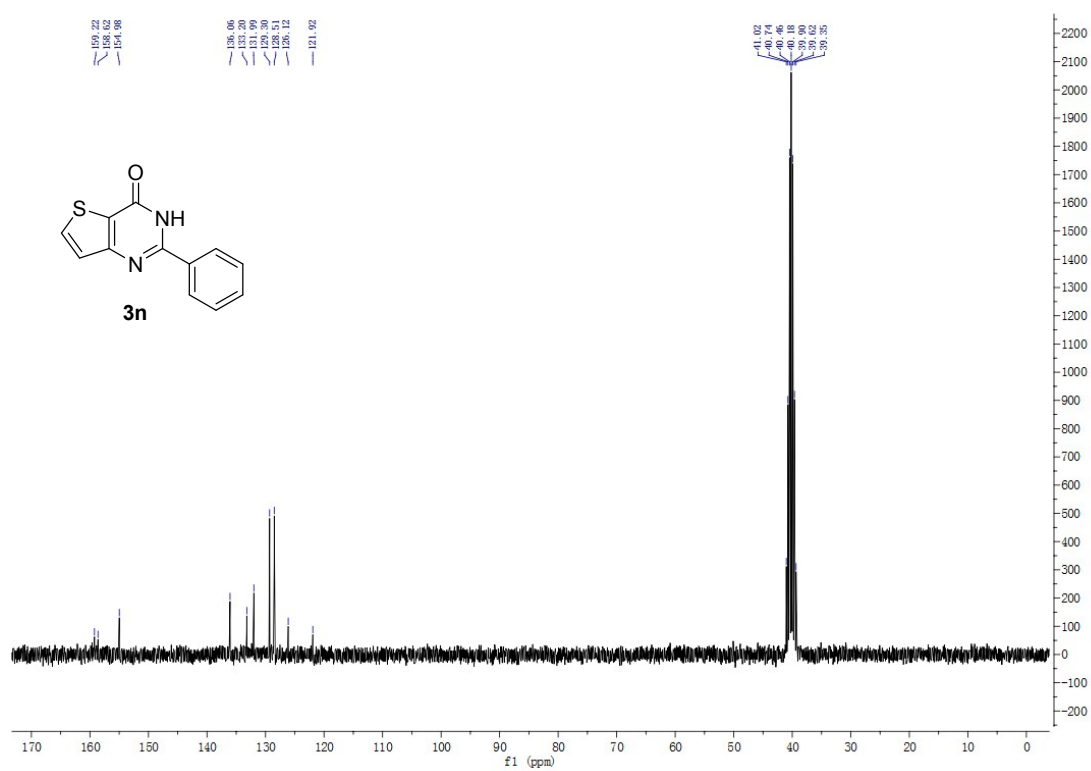

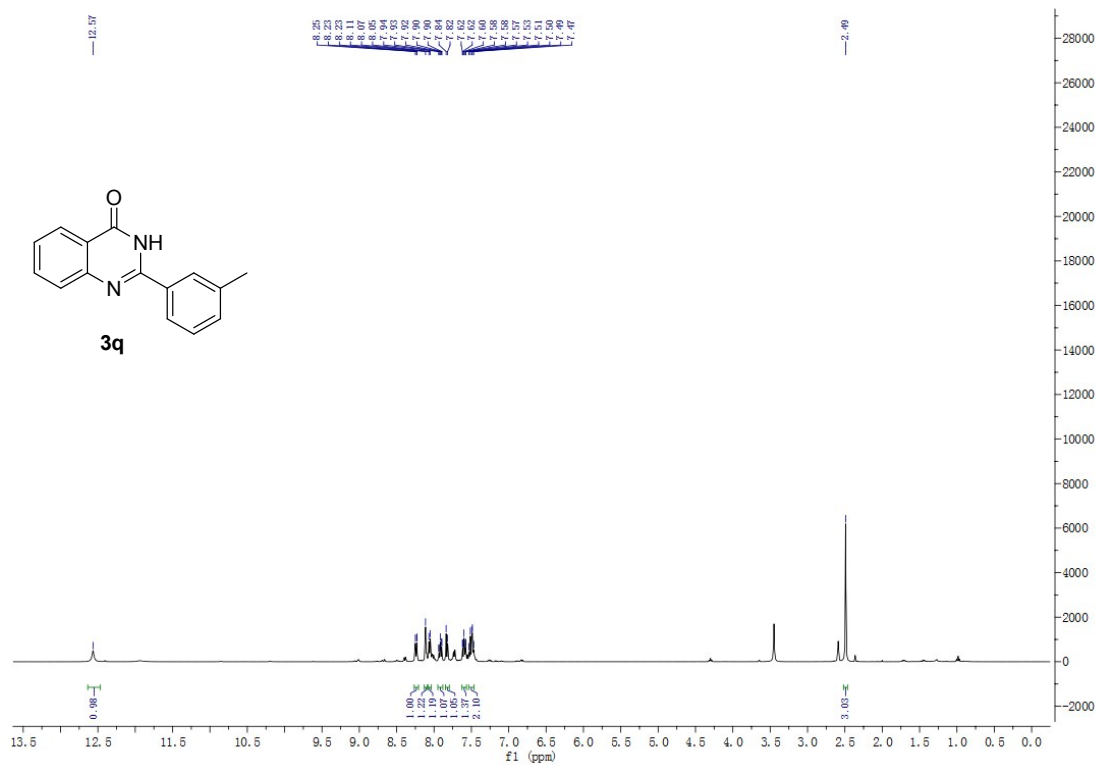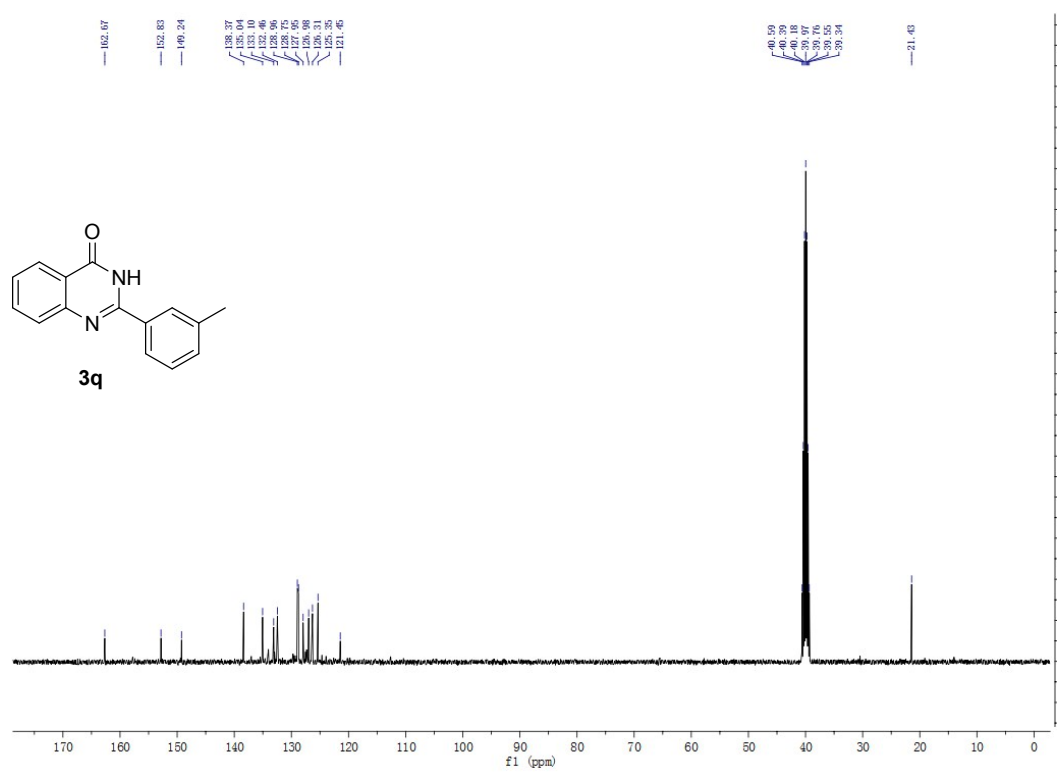

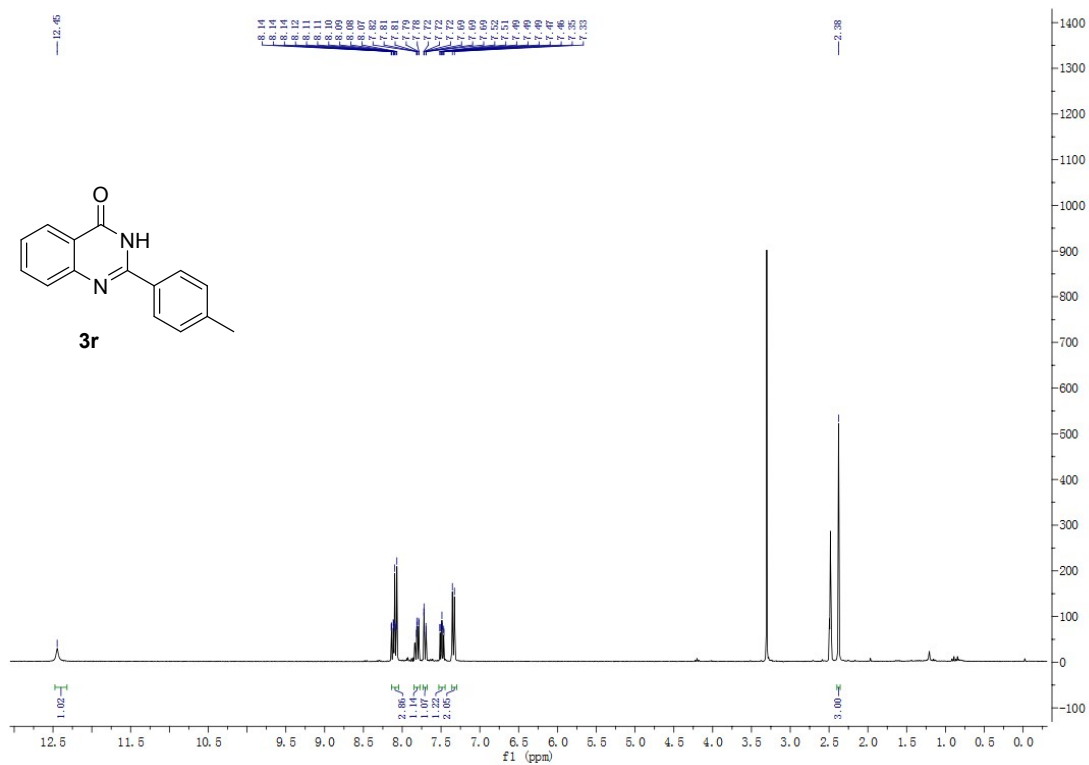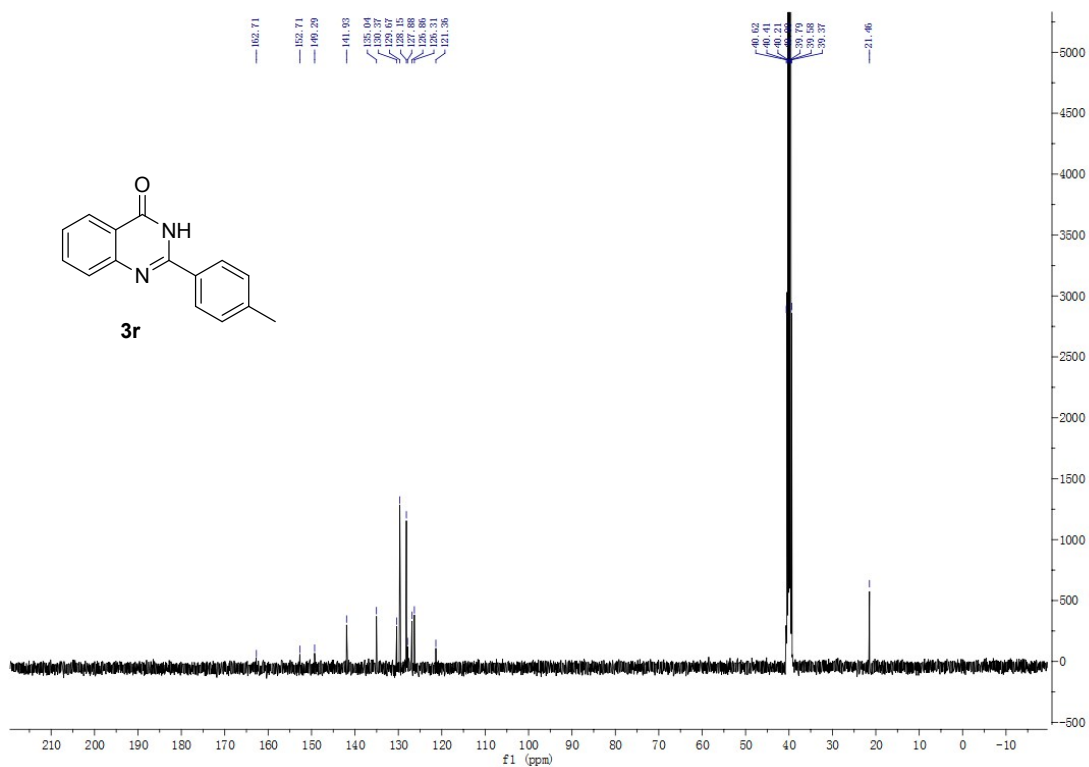

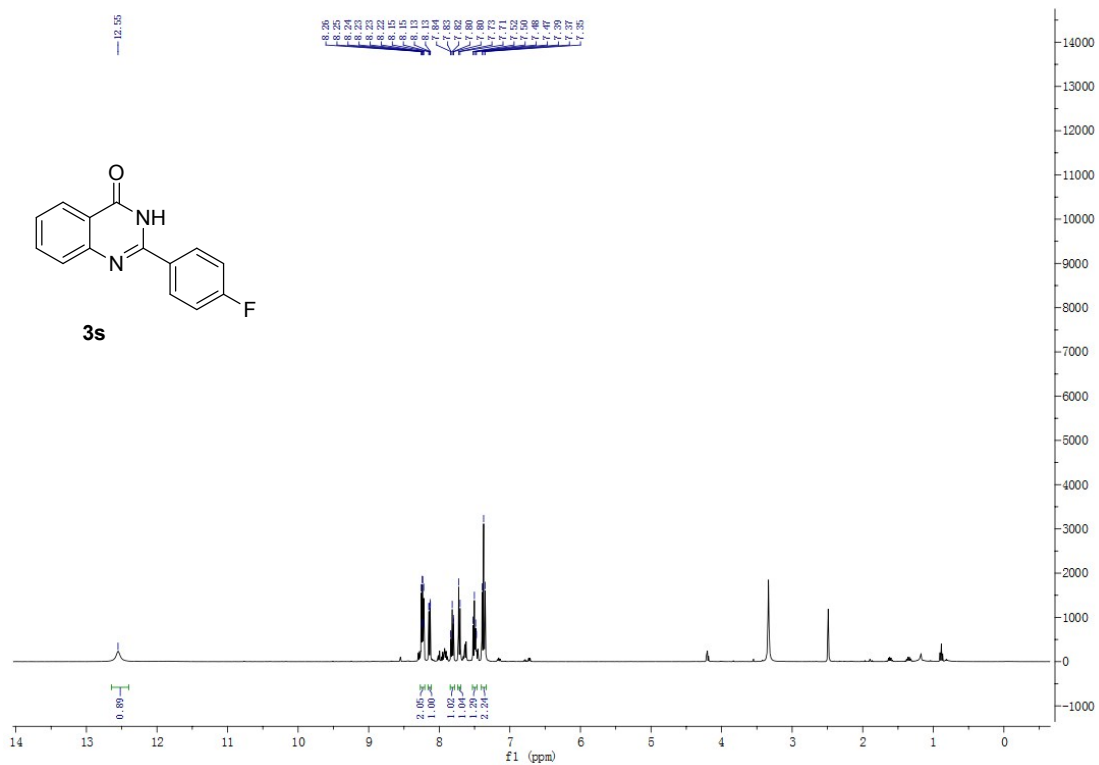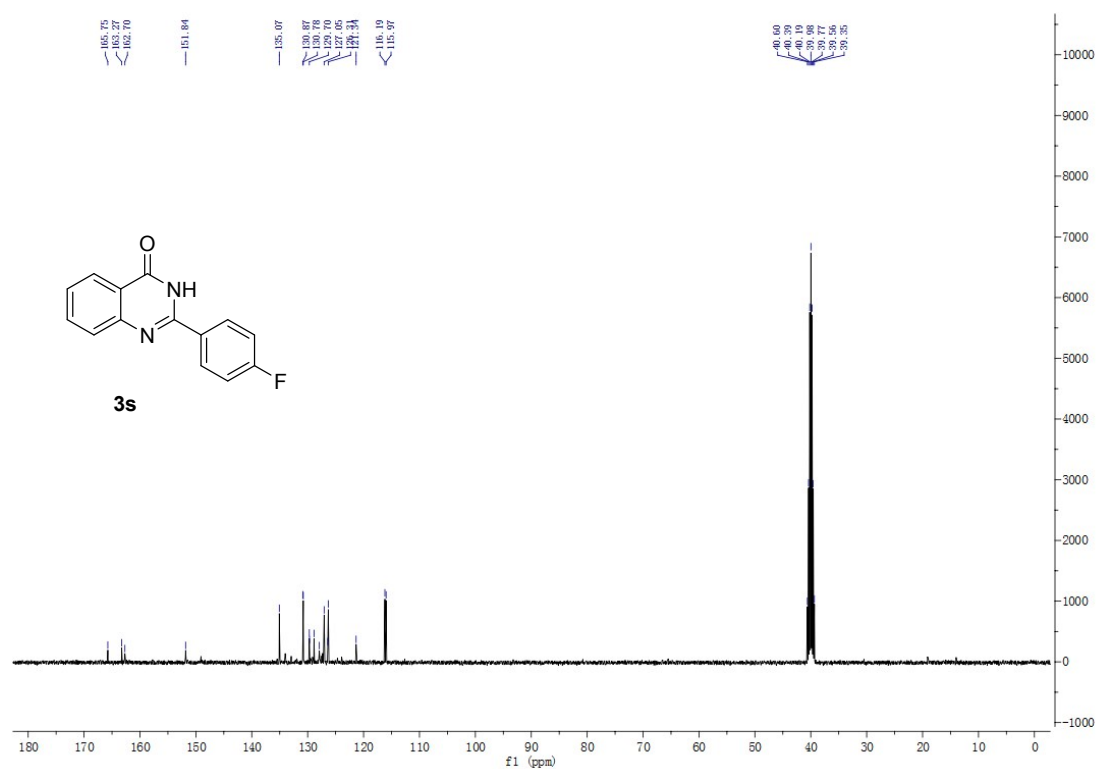

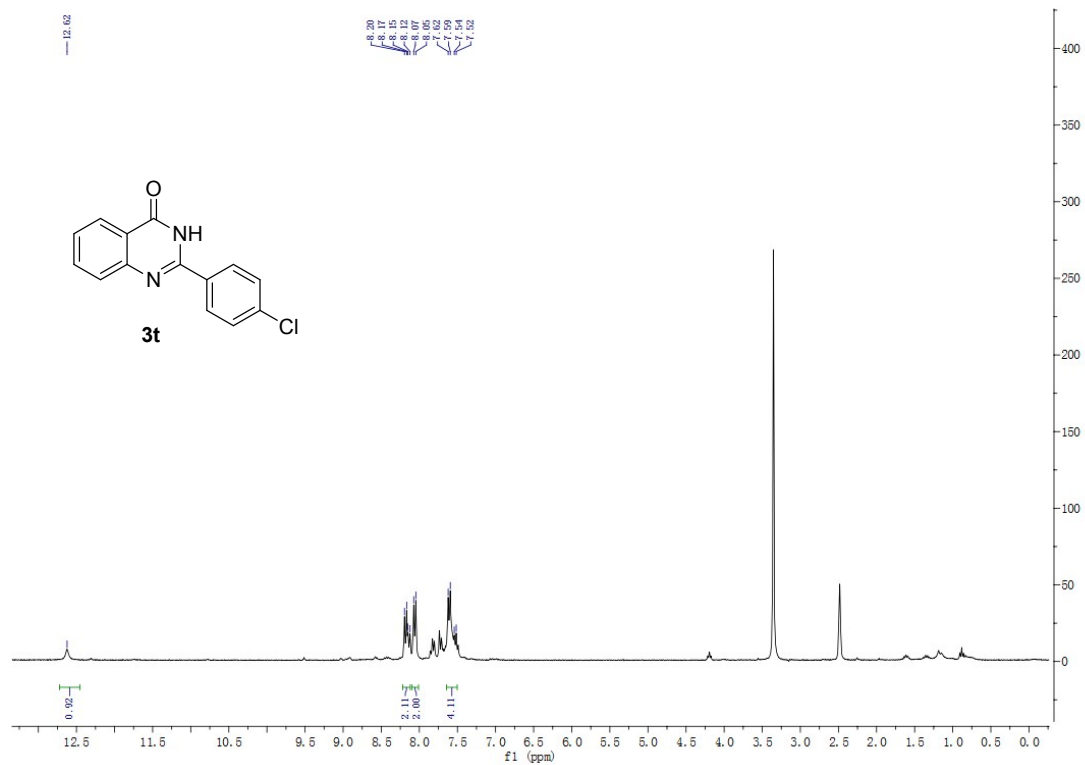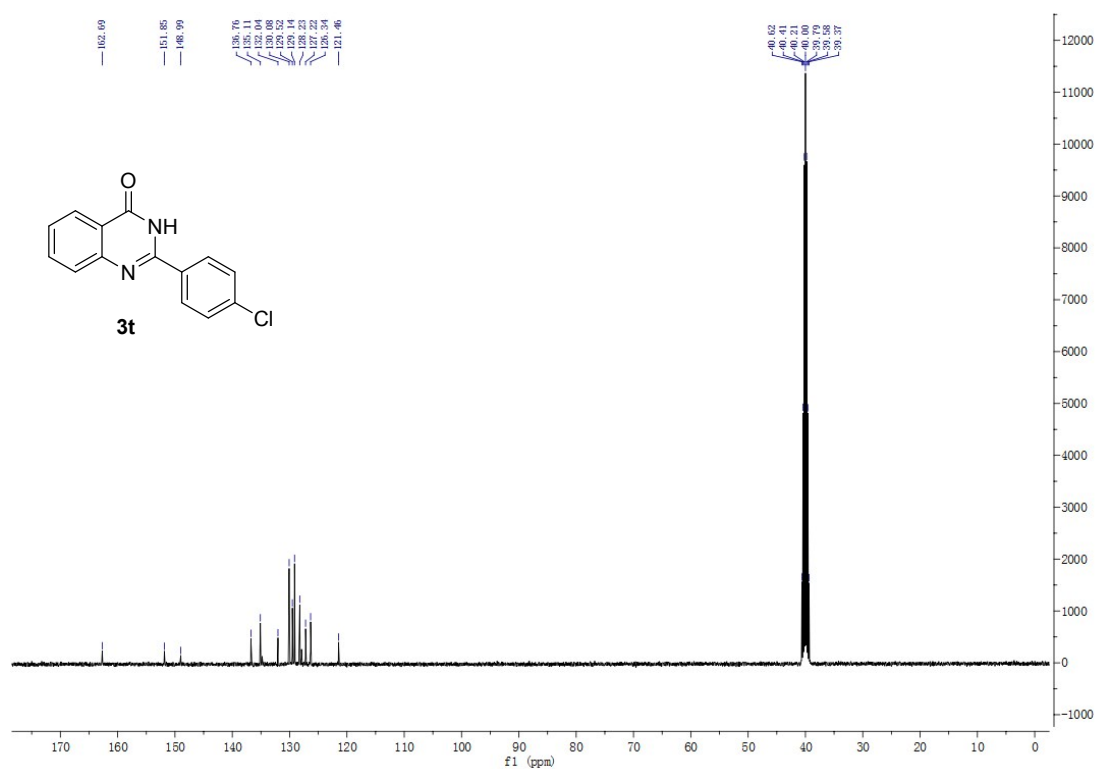

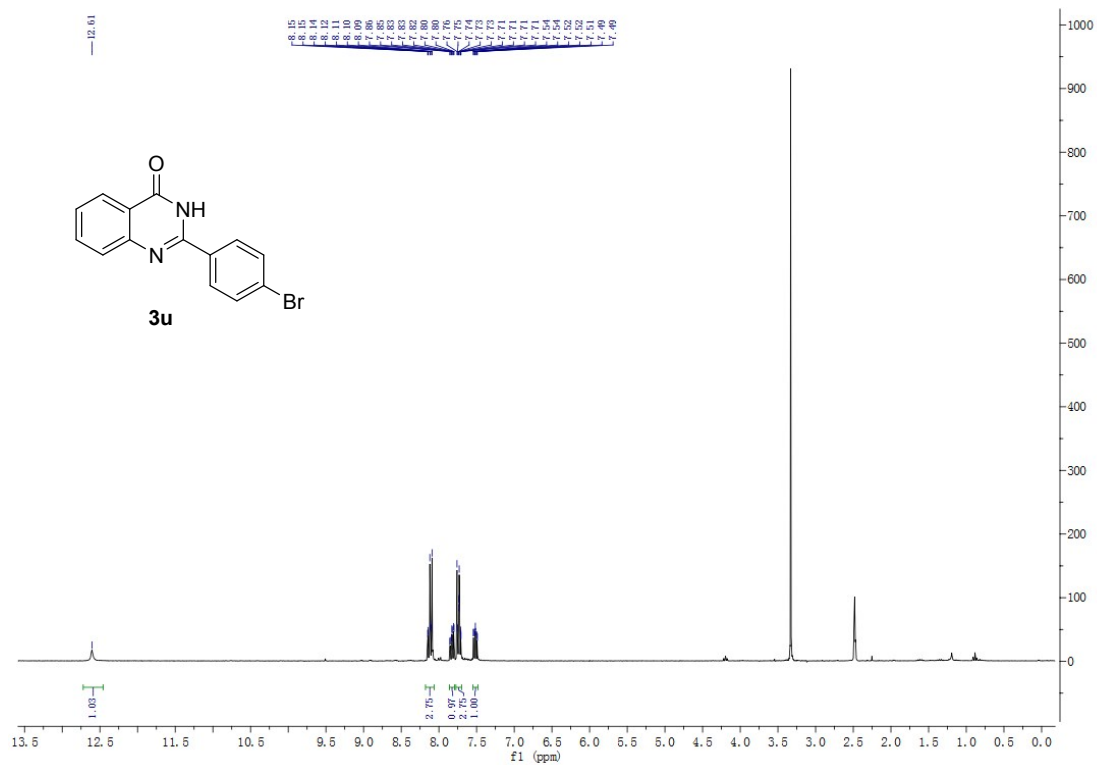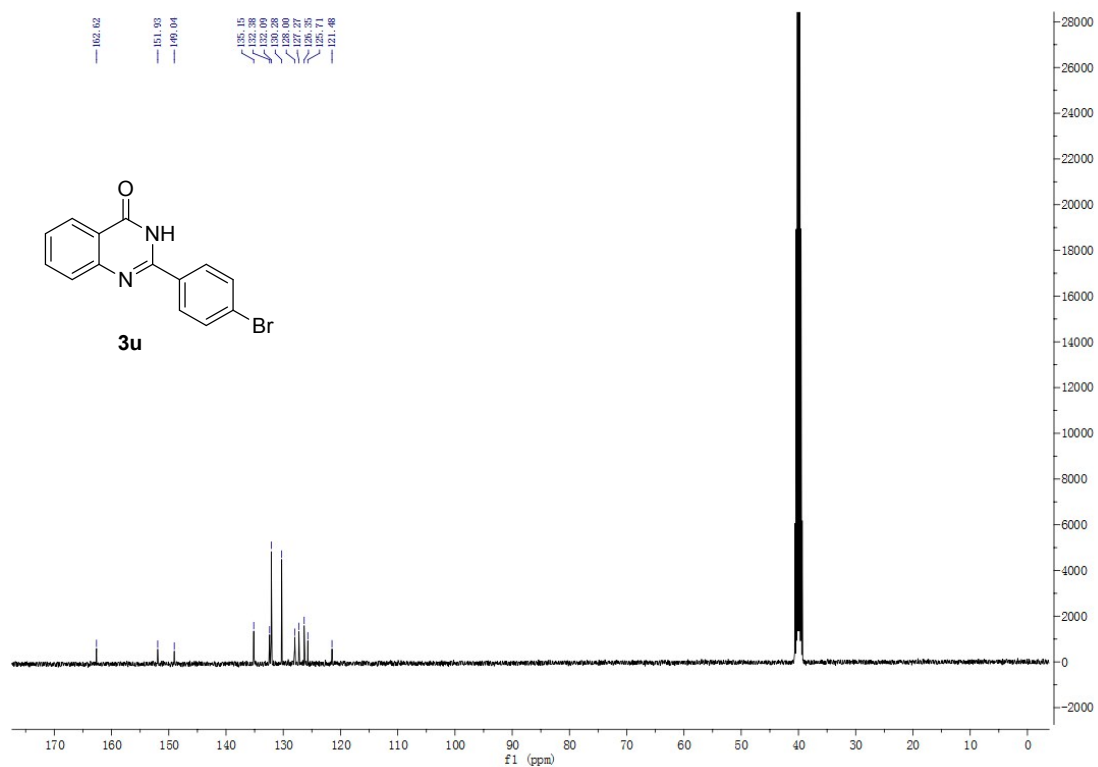

Supplement: c9nj02311a1.pdf [file c9nj02311a1.pdf]
